# Supplementary material for: Aberrant expression of a β-catenin gain-of-function mutant induces hyperplastic transformation in the mouse cornea
Source: Oxford University Press journal article supplement (doi:10.1242/jcs.063321), 2010-03-24
Supplement: jcs063321-sup-063321tables1.pdf [file jcs063321-sup-063321tables1.pdf]

**Table S1. Summary of  $\beta$ -catenin immunohistochemical stainings from human OSSN patients**

| <b>Case number</b> | <b>Nuclear <math>\beta</math>-Catenin</b> | <b>Diagnosis</b>                                                                           | <b>Gender/Age</b> |
|--------------------|-------------------------------------------|--------------------------------------------------------------------------------------------|-------------------|
| 1                  | ++                                        | Conjunctiva SCC and extend to orbital cavity;<br>SCC of right forearm(distance metastasis) | Female/89         |
| 2                  | +++                                       | Conjunctiva and lid SCC, OD                                                                | Male/60           |
| 3                  | +++                                       | SCC of cornea and conjunctiva, OD.                                                         | Male/83           |
| 4                  | +++                                       | CIN of conjunctiva and cornea                                                              | Female/74         |
| 5                  | ++                                        | Conjunctival tumor, OS                                                                     | Male/81           |
| 6                  | ++                                        | Malignant SCC of orbit and conjunctiva, OD                                                 | Male/69           |
| 7                  | ++                                        | Conjunctival CIN, OD                                                                       | Male/63           |
| 8                  | ++                                        | Conjunctival tumor                                                                         | Male/97           |
| 9                  | -                                         | Normal eye bank cornea                                                                     | Male/74           |

+++; Strong positive, ++; intermediate positive, +; weak positive, -; negative staining  
SCC, squamous cell carcinoma; CIN, corneal and/or conjunctiva intraepithelial neoplasia;  
OS, left eye; OD, right eye.
